# **Developing a routine lab test for absolute quantification of Her2 in Formalin Fixed Paraffin Embedded (FFPE) breast cancer tissues using Quantitative Dot Blot (QDB) method**

*Short title: Absolute quantification of biomarkers in FFPE samples with QDB method*

GuohuaYu<sup>1\*</sup>, Wenfeng Zhang<sup>2</sup>, Yunyun Zhang<sup>2</sup>, Jiahong Lv<sup>2</sup>, Jiandi Zhang<sup>2,3#</sup>, and FangrongTang<sup>2\*</sup>

1. Lab of Molecular Pathology, Dept of Pathology, Affiliated Yuhuangding Hospital of Qingdao University, Yantai, Shandong, P. R. China
2. Yantai Quantcision Diagnostics, Inc., a division of Quantcision Diagnostics, Inc., of USA, Yantai, Shandong, P. R. China
3. Center for Precision Medicine, Binzhou Medical University, Yantai, Shandong, P. R. China

\*: These authors contribute equally.

This research was funded by Yantai Quantcision Diagnostics, Inc., a division of Quantcision Diagnostics, Inc., at RTP, NC, US and by ZR2015HQ013 to GY.

ZW, FT, YZ, JL & JZ are employees of Yantai Quantcision Diagnostics, Inc, a division of Quantcision Diagnostics, Inc at RTP, NC, USA who own or has filed patent applications for QDB plate, QDB method, and QDB application in IHC analysis.

GY declared no conflict of interest.

This manuscript has 30 pages, including 3 tables and 7 figures.

#: Correspondence should be addressed to Dr. Jiandi Zhang, Quantcision Diagnostics, Inc., 400 Park Offices Dr. RTP, NC 27709, USA. [jiandi.zhang@outlook.com](mailto:jiandi.zhang@outlook.com)

## 1 **Abstract**

2 While the transition from current prevailing method of relative and semi-quantitative  
3 assessment of solid tumor biomarkers to their absolute quantitation promises improved  
4 objectivity, consistency and accuracy in daily clinical practice, this transition is hindered  
5 by lacking of suitable technique, especially for Formalin Fixed Paraffin Embedded  
6 (FFPE) tissue samples. In this retrospective study, Quantitative Dot Blot (QDB) method  
7 was adopted to measure Her2 levels absolutely and quantitatively at protein level using  
8 2X15  $\mu\text{m}$  FFPE breast cancer tissue slices collected sequentially and non-selectively  
9 from local hospital. Her2 levels measured from 332 samples using two diagnostic  
10 antibodies respectively were strongly correlated ( $r=0.963$ ,  $p=0.0000$ ). When the result  
11 was evaluated with results from IHC or FISH analysis using Receiving Operating  
12 Characteristics (ROC) analysis, we were able to achieve 100% sensitivity (95% CI:  
13 95.6% to 100%) and 99.3% specificity (95% CI: 96.14% to 99.98%) with results from  
14 IHC analysis using 0.267 nmole/g as cutoff, and 93.02% sensitivity (95%CI: 80.94% to  
15 98.54%) and 93.68% specificity (95% CI: 86.76% to 97.65%) with results from FISH  
16 analysis using 0.261 nmole/g as cutoff. Thus, QDB method is demonstrated to provide  
17 objective and consistent assessment of Her2 levels in FFPE samples with comparable  
18 results from both IHC and FISH analyses. It is also the first method to achieve absolute  
19 quantitation of tissue biomarkers in FFPE samples to meet daily clinical need.

20 **Keywords:** Biomarker; Her2; breast cancer; QDB; quantitative; continuous; high  
21 throughput; absolute.

## 22 **Introduction**

23 The accurate assessment of protein biomarkers for diagnosis, prediction and prognosis  
24 is essential to the future of precision medicine with direct impact on the targeted  
25 therapies for cancer treatment. However, although Immunohistochemistry (IHC) is the  
26 prevailing method in biomarker assessment for solid tumors, it is far from satisfactory to  
27 meet this goal. The inherent problems with IHC, including its lack of consistency and  
28 objectivity, prevent the usage of biomarkers in clinical diagnostics to their full potentials.  
29 The overall situation is aggravated by the fact that IHC provides a discrete result, thus  
30 unable to reflect the wide range of protein biomarker levels among patients.

31 There are several ongoing efforts to develop alternative methods to circumvent these  
32 limitations. Considering that the majority of clinical samples are preserved as Formalin  
33 Fixed Paraffin Embedded (FFPE) block in pathological practice, one more pre-requisite  
34 for any method to be adopted in routine clinical practice is that this method must be  
35 compatible with FFPE samples.

36 Selected Reaction Monitoring Mass Spectrometry (SRM-MS) may be the closest one to  
37 achieve this goal<sup>1-3</sup>. This method is objective, consistent, sensitive and compatible with  
38 FFPE samples. It also measures biomarker in FFPE samples as absolute and  
39 continuous variables. However, the complicated analytical processes and high costs  
40 limit its usage in routine clinical practice, let alone in the local clinical laboratories and  
41 clinical labs in developing countries. In addition, not all the FFPE samples were suitable  
42 for SRM-MS analysis<sup>1</sup>.

43 Recently, we have developed independently a Quantitative Dot Blot (QDB) method to  
44 measure the content of a protein molecule at tissue level as absolute and continuous  
45 variables<sup>4,5</sup>. It is a standardized assay, requiring minimum training and equipment to  
46 provide objective and consistent results in regular clinical laboratory. What is more, this  
47 method is designed for high throughput analysis.

48 We hypothesize that the large number of existing diagnostic antibodies clinically  
49 validated for IHC analysis (IHC antibodies) should be able to be adopted directly in QDB  
50 analysis. These antibodies are subjected to strict governmental regulations to be  
51 classified as either IVD or ASR antibodies. In a proof of concept (POC) study, we used  
52 frozen breast cancer tissues provided from local hospital to demonstrate that QDB  
53 method can measure several biomarkers including Her2, Estrogen receptor (ER),  
54 Progesterone receptor (PR) and Ki67 in breast cancer tissues simply, objectively,  
55 consistently and in high throughput format using these IHC antibodies (submitted for  
56 publication).

57 In this study, we extended QDB method to measure protein levels of Her2 (Her2/Neu or  
58 ERBB2) in 332 FFPE samples using the same two IHC antibodies, EP3 and 4B5 in our  
59 POC study. Her2 is one of the most used protein biomarkers among breast cancer  
60 patients<sup>6</sup>. Overexpression of this protein has been found among 20 ~30% invasive  
61 breast patients<sup>7</sup>. Targeted therapies against Her2, represented by Trastuzumab  
62 (Herceptin), have found success in treating patients testing Her2 positive (Her2+), but  
63 not with those testing negative (Her2-)<sup>8</sup>.

64 Currently, Her2 level is assessed mainly through IHC. Under this system, the Her2  
65 level is scored as 0, 1+, 2+ and 3+, with those scoring 0 and 1+ being defined as Her2-,

66 and those 3+ as Her2+. Samples scored as 2+ are defined as equivocal, requiring  
67 further Fluorescence in situ hybridization (FISH) analysis to differentiate Her2- from  
68 Her2+ samples. So far, the absolute quantification of Her2 levels in FFPE samples  
69 were only achievable using SRM-MS technique<sup>1,3,9</sup>.

70 We validated our results by examining the consistency of results measured with EP3  
71 and 4B5 antibodies respectively, and compared our results with those from both IHC  
72 and FISH analyses using Receiving Operative Characteristics (ROC) analysis. Finally,  
73 we re-evaluate the correlation between Her2 as absolute and continuous variables and  
74 other clinicopathologic parameters including age, tumor size, histological grades and  
75 metastasis statues of the tumor.

## 76 **Materials and methods**

### 77 *Human subjects and human cell lines*

78 A total of 332 of Formalin Fixed Paraffin Embedded (FFPE) breast cancer tissue  
79 specimens in 2X15  $\mu\text{m}$  slices were provided sequentially and non-selectively by  
80 Yuhuangding Hospital, Yantai, P. R. China from Jan. 2015 to Aug. 2017. All the  
81 samples were obtained in accordance with the Declaration of Helsinki, and approved by  
82 the Medical Ethics Committee of Yuhuangding Hospital. The clinicopathological  
83 characteristics of these patients were listed in Table 1.

84 MCF-7 and BT474 cell lysates were used as controls. Both of the cell lines were  
85 purchased from the Cell Bank of Chinese Academy of Sciences (Shanghai, China), and  
86 maintained according to the provider's instruction.

### 87 *General reagents*

88 All of the chemicals were purchased from Sinopharm Chemicals (Beijing, P. R. China).  
89 Recombinant human HER2/ErbB2 protein was purchased from Sino Biological Inc.  
90 (Beijing, China). QDB plate was provided by Quanticision Diagnostics, Inc (RTP, USA).  
91 Ventana anti-HER2/neu (4B5) rabbit monoclonal primary antibody was purchased from  
92 Roche Diagnostics GmbH. Rabbit anti-HER2 antibody (clone EP3) was purchased from  
93 ZSGB-BIO ([www.zsbio.com](http://www.zsbio.com), Beijing, China). HRP labeled Donkey Anti-Rabbit IgG  
94 secondary antibody was purchased from Jackson ImmunoResearch lab (West Grove,  
95 PA, USA). BCA total protein quantification kit was purchased from Thermo Fisher  
96 Scientific Inc (Calsband, CA, USA).

#### 97 *Preparation of FFPE tissue and cell lysates*

98 Two FFPE tissue slices at 15 $\mu$ m each (2X15 $\mu$ m) were put into 1.5ml Eppendorf tubes,  
99 and deparaffinized before they were solubilized using lysis buffer (50mM HEPES,  
100 137mM NaCl, 5mM EDTA, 1mM MgCl<sub>2</sub>, 10mM Na<sub>2</sub>P<sub>2</sub>O<sub>7</sub>, 1%TritonX-100, 10% glycerol)  
101 with protease inhibitors (2 $\mu$ g/ml Leupeptin, 2 $\mu$ g/ml Aprotinin, 1 $\mu$ g/ml pepstatin, 2mM  
102 PMSF, 2mM NaF). MCF-7 and BT474 cells were also lysed in the same lysis buffer  
103 with protease inhibitors. The supernatants were collected after centrifugation and the  
104 total amount of proteins was measured using BCA protein assay kit by following  
105 manufacturer's instructions.

#### 106 *QDB analysis*

107 FFPE tissue lysates were adjusted to 0.5  $\mu$ g/ $\mu$ l according to the BCA assay. Sample  
108 pool were prepared by mixing tissue lysates from four FFPE tissue specimens with an

109 IHC score of 3+, and was serially diluted side by side with the recombinant HER2  
110 protein for defining the standard curve of QDB analysis.

111 The QDB process was described elsewhere with minor modifications<sup>4,5</sup>. In brief, the  
112 final concentration of the FFPE tissue lysates was adjusted to 0.25  $\mu\text{g}/\mu\text{l}$ , and 2  $\mu\text{l}/\text{unit}$   
113 was used for QDB analysis in triplicate. The QDB plate was then dried for two hour at  
114 RT, soaked in transfer buffer for 10s, rinsed once with TBST, and then blocked in 4%  
115 non-fat milk for an hour. Next, it was put into a 96-well microplate with 100 $\mu\text{l}$  primary  
116 antibody (for clone EP3, 1:1500 in blocking buffer; for clone 4B5, 1:10 in PBS), and  
117 incubated overnight at 4°C. Afterward, the plate was rinsed twice with TBST and  
118 washed 3X10 mins. The plate was then incubated with a donkey anti-rabbit secondary  
119 antibody for 4 hours at RT, rinsed twice with TBST, and washed 4X10 mins. Finally, the  
120 QDB plate was inserted into a white 96-well plate pre-filled with 100 $\mu\text{l}/\text{well}$  ECL working  
121 solution for 3 mins. The chemiluminescence signals of the combined plate were  
122 quantified by using the Tecan Infiniti 200pro Microplate reader with the option “plate with  
123 cover”.

124 The consistency of the experiments was ensured by including BT474 and MCF-7 cell  
125 lysates with pre-documented Her2 level in all the experiments. The result was  
126 considered valid when the calculated Her2 level of BT474 was within 10% of  
127 documented Her2 level. The absolute her2 level was determined based on the dose  
128 curve of protein standard, with samples with chemiluminescence reading less than 2  
129 fold over blank being defined as non-detectable, and enter 0 for data analysis. For  
130 those samples with the chemiluminescence reading less than that of 30 pg Her2



131 recombinant protein, the narrow range (0-125pg) linear regression formula was used to  
132 calculate low her2 level.

133 *FISH analysis:*

134 Total of 16 samples were submitted to ZSGB-Bio, Inc ([www.zsbio.com](http://www.zsbio.com)) at Beijing,  
135 China for FISH analysis. The detailed reports are available upon request.

136 *Statistical analysis*

137 All the data were presented as Mean±SD. The difference between individual groups  
138 was calculated using unpaired two-tailed Student's t tests. P value <0.05 was  
139 considered statistically significant. The correlation analysis was performed using either  
140 Pearson's correlation coefficient analysis or Spearman's rank correlation analysis as  
141 indicated in the figure. The specificity, sensitivity of QDB method in comparison with  
142 either IHC or FISH was analyzed using receiver operating characteristic (ROC)  
143 analysis. All statistics were performed using the GraphPad Prism software version 7.0  
144 (GraphPad Software Inc., USA).

145 **Results:**

146 *Assay Development and Her2 measurement in FFPE samples*

147 The linear ranges of QDB analysis were first defined using FFPE specimens and  
148 recombinant Her2 protein with EP3 and 4B5 antibodies respectively. Slices of 2X15µm  
149 FFPE specimens were used to extract total protein by de-paraffinization and  
150 solubilization with Triton-X 100 lysis buffer. As a routine practice, total protein extracted  
151 from three or four specimens determined as Her2+ either through IHC analysis or FISH  
152 analysis were pooled together to define the linear range of the QDB analysis (Fig. 1).

153 The FFPE slices were provided sequentially and non-selectively by local hospital with  
154 clinicopathological characteristics listed in Table 1. The absolute Her2 levels in 332  
155 samples were measured with EP3 and 4B5 respectively. The flow diagram was shown  
156 in Fig. 2. The correlation between these results were analyzed using Pearson's  
157 correlation coefficient analysis with  $r=0.963$ ,  $p=0.0000$ ,  $n=332$  (Fig. 3). For simplification  
158 of description, we limited our analysis in this study with results measured with EP3  
159 clone only.

160 The distributions of Her2 levels among these samples were shown in Fig. 4A.  
161 Consistent with what we have observed with frozen tissues, the absolute Her2 level was  
162 distributed from non-detectable (we define the detectable signal below two fold of  
163 background as non-detectable, and enter 0 as final result) to as much as 31.31 nmole/g.  
164 The group average was  **$1.953\pm 0.254$**  nmole/g with the 75 percentile at 0.987 nmole/g.  
165 The samples were grouped further into 4 groups based on IHC scores (0, 1+, 2+, and  
166 3+) in Fig. 4B. The average Her2 level was  $0.045\pm 0.006$  ( $n=77$ ),  $0.049\pm 0.008$  ( $n=65$ ),  
167  $0.537\pm 0.122$  ( $n=108$ ), and  $7.12\pm 0.773$  ( $n=82$ ) nmole/g for group 0, 1+, 2+ and 3+  
168 respectively. The differences with statistical significance were observed between each  
169 individual groups ( $p<0.005$ ) when analyzed using unpaired two-tailed Student's t-test,  
170 except group 0 vs group 1+, where no statistical significant difference was observed.

#### 171 *Validation of QDB method*

172 While the only method for absolute quantification of Her2 levels was SRM-MS, which  
173 was still in developmental stage<sup>1,3,9</sup>, we had to rely on the results from both IHC and  
174 FISH analyses to validate our results indirectly, as the results from QDB measurement

175 were absolute and continuous variables, while those from FISH and IHC analyses were  
176 relative and discrete variables. Therefore, we evaluated the specificity and sensitivity of  
177 QDB method with both IHC and FISH analyses using receiver operating characteristic  
178 (ROC) analysis.

179 To compare QDB method with IHC analysis, we followed recommendations from both  
180 American Society of Clinical Oncology and College of American Pathologists<sup>10,11</sup> to  
181 group samples with IHC scores of 0 and 1+ as Her2-, and IHC score of 3+ as Her2+.  
182 IHC score of 2+ was excluded in the analysis. When the absolute Her2 levels from  
183 these two groups were used in ROC analysis, we achieved area under the ROC curve  
184 (AUC) at  $0.9998 \pm 0.0001$ , 95% CI at 0.9994 to 1, with  $p < 0.0001$  ( $n=224$ ) (Fig. 5A).

185 Using 0.267 nmole/g as cutoff, we were able to achieve 100% sensitivity (95% CI:  
186 95.6% to 100%) and 99.3% specificity (95% CI: 96.14% to 99.98%) with IHC results.

187 FISH analysis was recommended for samples with IHC score at 2+. There were 144  
188 samples provided with FISH results, including 6 equivocal cases. Among the rest of  
189 138 samples, 101 samples were with IHC score at 2+, and were excluded from ROC  
190 analysis of QDB and IHC analysis. Therefore we considered results from FISH analysis  
191 an independent validation of the developed cutoff value from ROC analysis of IHC  
192 results. Using 0.267 nmole/g as cutoff, we were able to achieve concordance rate with  
193 FISH analysis at 88.6% (the 6 equivocal cases were excluded in the analysis), and  
194  $\kappa=0.732$  with Cohen's kappa analysis).

195 We identified 16 samples (11.11%) in disagreement with provided FISH results using  
196 0.267 nmole/g as cutoff. To rule out potential misdiagnosis, these samples were  
197 submitted to a third party for independent FISH analysis (Table 2). For 9 Her2- samples

198 from initial FISH reports, 4 samples were affirmed Her2-, 4 were reported Her2+ and 1  
199 was reported as equivocal case. Among 7 Her2+ samples from initial FISH reports, 4  
200 were affirmed Her2+, 2 was reported Her2-, and 1 was determined equivocal. When  
201 these information was incorporated into the revised FISH results, concordance rate was  
202 increased to 94.2% between FISH analysis and QDB method ( $\kappa=0.865$  with Cohen's  
203 Kappa analysis).

204 We also evaluated QDB results with FISH analysis using ROC analysis independently  
205 using the revised FISH results. As shown in Fig. 5B, we were able to achieve area  
206 under the ROC curve (AUC) at  $0.978\pm 0.0112$ , with 95% CI at 0.9561 to 0.9999,  
207  $p<0.0001$  ( $n=138$ ). Using Her2 level at 0.261 nmole/g as cutoff, we were able to  
208 achieve 93.02% sensitivity (95% CI: 80.94% to 98.54%) and 93.68% specificity (95%  
209 CI: 86.76% to 97.65%). At this value, we were able to achieve 99.6% concordance rate  
210 between QDB and IHC analyses. The cutoff values developed from ROC analyses of  
211 IHC and FISH analyses respectively were shown in a log scale chart in Fig. 5C.

212 Having evaluated QDB method with both FISH and IHC analyses, we analyzed next the  
213 correlation between Her2 copy numbers from FISH analysis, reflected by the ratio of  
214 Her2 number over chromosome 17 number (Her2/CEP17), with Her2 protein level as  
215 continuous variables in Fig. 6. We found a strong correlation between DNA  
216 amplification level and Her2 protein level, with  $r=0.75$  when Pearson's correlation  
217 coefficient analysis was performed ( $n=122$ ).

218 *Exploration of the correlation between clinicopathologic factors and Her2 as absolute*  
219 *and continuous variables*

220 The quantitated Her2 levels in FFPE samples allows us to investigate the correlation  
221 between Her2 levels as absolute and continuous variables with other clinicopathologic  
222 factors including age, histological grade by Nottingham grading system, tumor size and  
223 metastasis status (Table 3). Her2 levels were found to be associated significantly with  
224 histological grade based on Nottingham grading system using Spearman's rank  
225 correlation analysis ( $\rho=0.195$ ,  $p=0.001$ ), a conclusion consistent with previous studies  
226 based on IHC analysis<sup>12,13</sup>. In the same study, we found age was significantly  
227 associated with Her2 based on IHC analysis ( $\rho=-0.117$ ,  $p<0.05$ ). However, this  
228 conclusion was not supported when the absolute and quantitative levels of Her2 were  
229 used in the analysis.

230 Her2 distribution by histological grade was further analyzed in Fig. 7. We observed the  
231 average of these samples by Grades at  $0.791\pm 0.555$ ,  $1.554\pm 0.330$ ,  $3.271\pm 0.535$   
232 nmole/g for Grade I, Grade II, and Grade III respectively. There were statistical  
233 significance between Grade I vs Grade III ( $p< 0.05$ ) and grade II vs Grade III ( $p=0.005$ )  
234 using unpaired two-tailed Student's t-test. We also calculated the percentage of Her2+  
235 in each grade with 8.3% for Grade I, 29.7% for Grade II and 47.1% for Grade III. Thus,  
236 the possibility of Her2+ for Grade III patient was 5.7 fold over that of Grade I patient.

## 237 **Discussion**

238 In this study, we demonstrated the feasibility of QDB method to measure Her2 levels in  
239 FFPE samples as absolute and continuous variables. The method can be easily  
240 standardized to measure the protein level objectively, consistently and in high  
241 throughput format. It also requires minimum training to be adopted in any clinical lab

242 with the access of a microplate reader. Thus, we presented a method with clear  
243 advantage over the prevailing methods of IHC and FISH for assessment of Her2 levels  
244 to meet the routine clinical need. It is also the first method, to our knowledge, for  
245 absolute quantitation of tissue biomarkers in FFPE samples suitable for routine clinical  
246 practice. Since there is at least one clinically validated IHC antibody (either as IVD or  
247 ASR antibodies) for each biomarker in clinical diagnosis and prognosis, the adoption of  
248 QDB method promises assessment of most, if not all of these biomarkers as absolute  
249 and continuous variables in the near future.

250 Even for the assessment of Her2 levels *per se*, the minimum requirements in equipment  
251 and personnel training ensure the consistency, objectivity and accuracy of the results  
252 over both FISH and IHC analyses. The inherent validation steps in the analytical  
253 process, including cell lysates with pre-determined Her2 content, would significantly  
254 reduce the inter-laboratory variations. It is perceivable the adoption of this method  
255 would significantly improve the accuracy of Her2 testing in clinical practice, especially  
256 for local laboratories, and clinical laboratories in developing countries.

257 QDB method and IHC analysis were both based on antigen-antibody interaction. In  
258 addition, we on purposely used those antibodies already validated for IHC analysis in  
259 our assay (either as IVD or ASR antibodies). Therefore, this method can be considered  
260 a tradeoff of morphology for accuracy. Theoretically, results from QDB analysis should  
261 match very well with those from IHC analysis when IHC analysis was performed  
262 properly as dichotomous variables.

263 However, QDB method is fundamentally different from FISH analysis, as one analyzed  
264 at protein level (QDB), while the other one analyzed at DNA level (FISH). It is well

265 recognized the FISH analysis has the inherent drawback of being unable to reflect  
266 faithfully changes at protein level<sup>14</sup>. Therefore, we do not expect our QDB results to  
267 match perfectly with those from FISH analysis. In this study, even after third party  
268 verification, there were still 8 samples with their QDB results different from FISH reports,  
269 leading to a concordance rate between QDB and FISH at 94.2%. Nonetheless,  
270 considering one major usage of Her2 assessment is for antibody-based targeted  
271 therapy, we believe QDB results are more clinical relevant than those from FISH  
272 analysis.

273 Our results were also comparable with those from SRM-MS. The distribution of Her2  
274 protein in this study was from non-detectable to 31.31 nmole/g (n=332), in comparison  
275 with 0.16 to 17.45 nmole/g (the unit was converted from amole/ $\mu$ g for comparison  
276 purpose) in one of the SRM-MS studies (n=270). When groups by IHC scores of 0, 1+,  
277 2+, and 3+, the averages for SRM-MS were 0.19, 0.26, 0.41 and 4.21 nmole/g,  
278 compared with 0.04, 0.05, 0.54 and 7.12 nmole/g in QDB measurements. However, the  
279 suggested cutoff from SRM-MS method was at 0.74 nmole/g, in contrast to the  
280 suggested either 0.261 or 0.267 nmole/g in this study. We do not have a definite  
281 answer to this discrepancy yet.

282 One possible explanation might be that QDB methods highly epitope dependent. In  
283 fact, we consistently obtained different results with EP3 from those with 4B5 when  
284 analyzed side by side using the same lysate prepared from either frozen tissue or FFPE  
285 specimens. It is possible that these two antibodies recognize different fraction of total  
286 Her2 protein with different conformational epitopes. For this reason, it is absolute  
287 necessary to specify which antibody was used when reporting Her2 levels using QDB

288 method. In contrast, in SRM-MS analysis, total Her2 protein is measured after all forms  
289 of Her2 protein are eventually broke down with the aid of trypsin digestion.

290 Results from both QDB and SRM-MS showed that even among those samples currently  
291 classified as Her2+, there still existed significant differences among the samples. The  
292 highest level we measured in QDB analysis was over 100 fold over the proposed cutoff  
293 value with both antibodies. This wide distribution of Her2 levels among individual  
294 samples were also reported in several other studies including Nuciforo et al study<sup>1,15-17</sup>.  
295 Studies based on SRM-MS method showed that patients with higher level of Her2  
296 responded better to Herceptin treatment in two types of cancer (gastric cancer and  
297 breast cancer), which further emphasized the necessity to quantify accurately the Her2  
298 levels among cancer patients<sup>1,17</sup>.

299 In conclusion, QDB method was demonstrated in this study to measure her2 level in  
300 FFPE specimens as absolute and continuous variables, with clear advantage of being  
301 simple, objective, consistent and in high throughput format. This method provides a  
302 platform to develop assays systematically for absolute quantitation of tissue biomarkers  
303 in FFPE specimen for routine clinical use. The fully implementation of this method will  
304 also allow us measure systematically tissue biomarkers as absolute and continuous  
305 variables over a huge number of FFPE specimens collected over the years. The future  
306 perspective in this area is very encouraging, as it may lead a new direction in proteomic  
307 research where bioinformatical tools will be used to further explore these biomarkers at  
308 population level.

### 309 **Acknowledgements**

310 **Author contributions:** FT, WZ, and YZ performed all the experiments, collected data



311 and performed data analysis, GY provided clinical samples and performed data analysis,  
312 JL participated in data collection, GT, FT & JZ participated in data interpretation, FT  
313 supervised all the experiments, JZ designed and supervised the overall study and drafted  
314 the manuscript.

## 315 **References**

- 316 1. Nuciforo P, Thyparambil S, Aura C, Garrido-Castro A, Vilaro M, Peg V, Jimenez J,  
317 Vicario R, Cecchi F, Hoos W, Burrows J, Hembrough T, Ferreres JC, Perez-Garcia  
318 J, Arribas J, Cortes J, Scaltriti M. High HER2 protein levels correlate with increased  
319 survival in breast cancer patients treated with anti-HER2 therapy. *Mol Oncol*, 2016,  
320 10:138–47
- 321 2. Hembrough T, Thyparambil S, Liao W-L, Darfler MM, Abdo J, Bengali KM, Taylor P,  
322 Tong J, Lara-Guerra H, Waddell TK, Moran MF, Tsao M-S, Krizman DB, Burrows J.  
323 Selected Reaction Monitoring (SRM) Analysis of Epidermal Growth Factor Receptor  
324 (EGFR) in Formalin Fixed Tumor Tissue. *Clin Proteomics*, 2012, 9:5
- 325 3. Steiner C, Tille J-C, Lamerz J, Geijtenbeek SK van, McKee TA, Venturi M, Rubbia-  
326 Brandt L, Hochstrasser D, Cutler P, Lescuyer P, Ducret A. Quantification of HER2  
327 by Targeted Mass Spectrometry in Formalin-Fixed Paraffin-Embedded (FFPE)  
328 Breast Cancer Tissues. *Molecular & Cellular Proteomics*, 2015, 14:2786–99
- 329 4. Tian G, Tang F, Yang C, Zhang W, Bergquist J, Wang B, Mi J, Zhang J. Quantitative  
330 dot blot analysis (QDB), a versatile high throughput immunoblot method.  
331 *Oncotarget*, 2017, 8:58553–62
- 332 5. Qi X, Zhang Y, Zhang Y, Ni T, Zhang W, Yang C, Mi J, Zhang J, Tian G. High  
333 Throughput, Absolute Determination of the Content of a Selected Protein at Tissue  
334 Levels Using Quantitative Dot Blot Analysis (QDB). *JoVE (Journal of Visualized  
335 Experiments)*, 2018:e56885–e56885

- 336 6. Yan M, Schwaederle M, Arguello D, Millis SZ, Gatalica Z, Kurzrock R. HER2  
337 expression status in diverse cancers: review of results from 37,992 patients. *Cancer*  
338 *Metastasis Rev*, 2015, 34:157–64
- 339 7. Ross JS, Fletcher JA. The HER-2/neu oncogene in breast cancer: prognostic factor,  
340 predictive factor, and target for therapy. *Stem Cells*, 1998, 16:413–28
- 341 8. Romond EH, Perez EA, Bryant J, Suman VJ, Geyer CEJ, Davidson NE, Tan-Chiu E,  
342 Martino S, Paik S, Kaufman PA, Swain SM, Pisansky TM, Fehrenbacher L, Kutteh  
343 LA, Vogel VG, Visscher DW, Yothers G, Jenkins RB, Brown AM, Dakhil SR,  
344 Mamounas EP, Lingle WL, Klein PM, Ingle JN, Wolmark N. Trastuzumab plus  
345 Adjuvant Chemotherapy for Operable HER2-Positive Breast Cancer. *New England*  
346 *Journal of Medicine*, 2005, 353:1673–84
- 347 9. Catenacci DVT, Liao W-L, Zhao L, Whitcomb E, Henderson L, O’Day E, Xu P,  
348 Thyparambil S, Krizman D, Bengali K, Uzzell J, Darfler M, Cecchi F, Blackler A,  
349 Bang Y-J, Hart J, Xiao S-Y, Lee SM, Burrows J, Hembrough T. Mass-spectrometry-  
350 based quantitation of Her2 in gastroesophageal tumor tissue: comparison to IHC  
351 and FISH. *Gastric Cancer*, 2016, 19:1066–79
- 352 10. Wolff AC, Hammond MEH, Hicks DG, Dowsett M, McShane LM, Allison KH, Allred  
353 DC, Bartlett JMS, Bilous M, Fitzgibbons P, Hanna W, Jenkins RB, Mangu PB, Paik  
354 S, Perez EA, Press MF, Spears PA, Vance GH, Viale G, Hayes DF.  
355 Recommendations for Human Epidermal Growth Factor Receptor 2 Testing in  
356 Breast Cancer: American Society of Clinical Oncology/College of American  
357 Pathologists Clinical Practice Guideline Update. *JCO*, 2013, 31:3997–4013

- 358 11. Wolff AC, Hammond MEH, Schwartz JN, Hagerty KL, Allred DC, Cote RJ, Dowsett  
359 M, Fitzgibbons PL, Hanna WM, Langer A, McShane LM, Paik S, Pegram MD, Perez  
360 EA, Press MF, Rhodes A, Sturgeon C, Taube SE, Tubbs R, Vance GH, van de  
361 Vijver M, Wheeler TM, Hayes DF, American Society of Clinical Oncology, College of  
362 American Pathologists. American Society of Clinical Oncology/College of American  
363 Pathologists guideline recommendations for human epidermal growth factor  
364 receptor 2 testing in breast cancer. *J Clin Oncol*, 2007, 25:118–45
- 365 12. Aman NA, Doukoure B, Koffi KD, Kouï BS, Traore ZC, Kouyate M, Effi AB. HER2  
366 overexpression and correlation with other significant clinicopathologic parameters in  
367 Ivorian breast cancer women. *BMC Clin Pathol*, 2019, 19:1
- 368 13. Zhen H, Yang L, Li L, Yu J, Zhao L, Li Y, Li Q. Correlation analysis between  
369 molecular subtypes and Nottingham Prognostic Index in breast cancer. *Oncotarget*,  
370 2017, 8:74096–105
- 371 14. Tse CH, Hwang HC, Goldstein LC, Kandalaf PL, Wiley JC, Kussick SJ, Gown AM.  
372 Determining True HER2 Gene Status in Breast Cancers With Polysomy by Using  
373 Alternative Chromosome 17 Reference Genes: Implications for Anti-HER2 Targeted  
374 Therapy. *JCO*, 2011, 29:4168–74
- 375 15. Cheng H, Bai Y, Sikov W, Sinclair N, Bossuyt V, Abu-Khalaf MM, Harris LN, Rimm  
376 DL. Quantitative measurements of HER2 and phospho-HER2 expression:  
377 correlation with pathologic response to neoadjuvant chemotherapy and  
378 trastuzumab. *BMC Cancer*, 2014, 14:326
- 379 16. Denkert C, Huober J, Loibl S, Prinzler J, Kronenwett R, Darb-Esfahani S, Brase JC,  
380 Solbach C, Mehta K, Fasching PA, Sinn BV, Engels K, Reinisch M, Hansmann M-L,

381       Tesch H, von Minckwitz G, Untch M. HER2 and ESR1 mRNA expression levels and  
382       response to neoadjuvant trastuzumab plus chemotherapy in patients with primary  
383       breast cancer. *Breast Cancer Research*, 2013, 15:R11

384   17. An E, Ock C-Y, Kim T-Y, Lee K-H, Han S-W, Im S-A, Kim T-Y, Liao W-L, Cecchi F,  
385       Blackler A, Thyparambil S, Kim WH, Burrows J, Hembrough T, Catenacci DVT, Oh  
386       D-Y, Bang Y-J. Quantitative proteomic analysis of HER2 expression in the selection  
387       of gastric cancer patients for trastuzumab treatment. *Ann Oncol*, 2017, 28:110–5

388 **Tables**

389 **Table 1: The clinicopathological characteristics of the patients.**

| <b>Variable</b>           |          | <b>No. of patients</b> | <b>Average±SEM</b> | <b>Percentage</b> |
|---------------------------|----------|------------------------|--------------------|-------------------|
| <b>Age (y)</b>            | Total    | 332                    | 53.3±0.6           |                   |
|                           | <50      | 122                    |                    | 36.7%             |
|                           | ≥50      | 209                    |                    | 63.0%             |
|                           | Unknown  | 1                      |                    | 0.35              |
| <b>Histological Grade</b> | I        | 36                     |                    | 10.8%             |
|                           | II       | 145                    |                    | 43.7%             |
|                           | III      | 119                    |                    | 35.8%             |
|                           | Unknown  | 32                     |                    | 9.6%              |
| <b>Tumor Size (mm)</b>    | Total    | 332                    | 2.3±0.6            |                   |
|                           | ≤20      | 173                    |                    | 52.1%             |
|                           | 20~50    | 151                    |                    | 45.5%             |
|                           | >50      | 5                      |                    | 1.5%              |
|                           | Unknown  | 3                      |                    | 0.9%              |
| <b>Histological Type</b>  | Ductal   | 298                    |                    | 89.85             |
|                           | Lobular  | 9                      |                    | 2.7%              |
|                           | Other    | 23                     |                    | 6.9%              |
|                           | Unknown  | 2                      |                    | 0.6%              |
| <b>Nodal Status</b>       | Negative | 220                    |                    | 66.3%             |
|                           | Positive | 112                    |                    | 33.7%             |

|                    |           |     |  |       |
|--------------------|-----------|-----|--|-------|
| <b>Her2 (IHC)</b>  | 0         | 77  |  | 23.2% |
|                    | 1+        | 65  |  | 19.6% |
|                    | 2+        | 108 |  | 32.5% |
|                    | 3+        | 82  |  | 24.7% |
| <b>Her2 (FISH)</b> | Negative  | 95  |  | 28.6% |
|                    | Equivocal | 6   |  | 1.8%  |
|                    | Positive  | 43  |  | 13.0% |
|                    | Unknown   | 188 |  | 56.6% |

390

391 **Table 2: Verification by the third party of 16 samples with disagreed QDB results**  
 392 **from locally provided FISH results.**

| <b>Sample NO.</b> | <b>FISH</b><br><i>(local hospital)</i> | <b>QDB</b><br><i>(nmole/g)</i> | <b>FISH</b><br><i>(Third party)</i> |
|-------------------|----------------------------------------|--------------------------------|-------------------------------------|
| 290               | negative                               | <b>0.547</b>                   | Equivocal                           |
| 79                |                                        | <b>0.459</b>                   | Negative                            |
| 119               |                                        | <b>0.686</b>                   | Negative                            |
| 141               |                                        | <b>0.365</b>                   | Negative                            |
| 298               |                                        | <b>0.681</b>                   | Negative                            |
| 149               |                                        | <b>0.531</b>                   | <b>Positive</b>                     |
| 293               |                                        | <b>0.520</b>                   | <b>Positive</b>                     |
| 294               |                                        | <b>0.849</b>                   | <b>Positive</b>                     |
| 159               |                                        | <b>0.967</b>                   | <b>Positive</b>                     |
| 22                |                                        | positive                       | 0.068                               |
| 96                | 0                                      |                                | Negative                            |
| 286               | 0.050                                  |                                | Negative                            |
| 64                | 0.102                                  |                                | <b>Positive</b>                     |
| 288               | 0.212                                  |                                | <b>Positive</b>                     |
| 218               | 0.213                                  |                                | <b>Positive</b>                     |
| 301               | 0.262                                  |                                | <b>Positive</b>                     |

393



394 The Her2 levels measured with QDB method were used to separate samples into Her2+  
395 and Her2- using suggested cutoff value at 0.267 nmole/g. There were 16 samples  
396 identified with disagreed QDB and FISH results. These samples were sent to a third  
397 party to rule out potential misdiagnoses, and the results were shown at the right column.  
398 All the positive results, either from FISH or QDB analyses, were in bold. The  
399 concordance rate would improve to 94.2% ( $\kappa=0.865$  using Cohen's Kappa analysis)  
400 when the results from third party were incorporated in the analysis.

401 **Table 3: Assessment of relationships between clinicopathologic features and**  
402 **Her2 levels by QDB method and IHC analysis respectively.**

| Variable | Age     | Histological Grade | Tumor size | Nodal status |
|----------|---------|--------------------|------------|--------------|
| QDB      | -0.084  | 0.195**            | 0.039      | -0.041       |
| IHC      | -0.117* | 0.204***           | 0.087      | -0.019       |

403 \*  $p < 0.05$ ; \*\*  $p < 0.001$ ; \*\*\*  $p < 0.0005$ .

404 Her2 levels, assessed either by QDB method as absolute and continuous variables, or  
405 IHC analysis as relative and discrete variables, were used to explore the putative  
406 association with clinicopathological features using Spearman's rank correlation analysis  
407 using Graphpad 7.0. The statistical significant associations were indicated in the figure.  
408 The histological grades based on Nottingham grading system were found to be  
409 associated with Her2 levels assessed either by IHC ( $\rho=0.195$ ,  $p < 0.001$ ) or QDB  
410 measurement ( $\rho=0.204$ ,  $p < 0.0005$ ) with statistical significance.

411 **Figures**

412 **Fig.1: Defining the linear range of QDB measurements with two anti-Her2**  
413 **antibodies, EP3 and 4B5.**

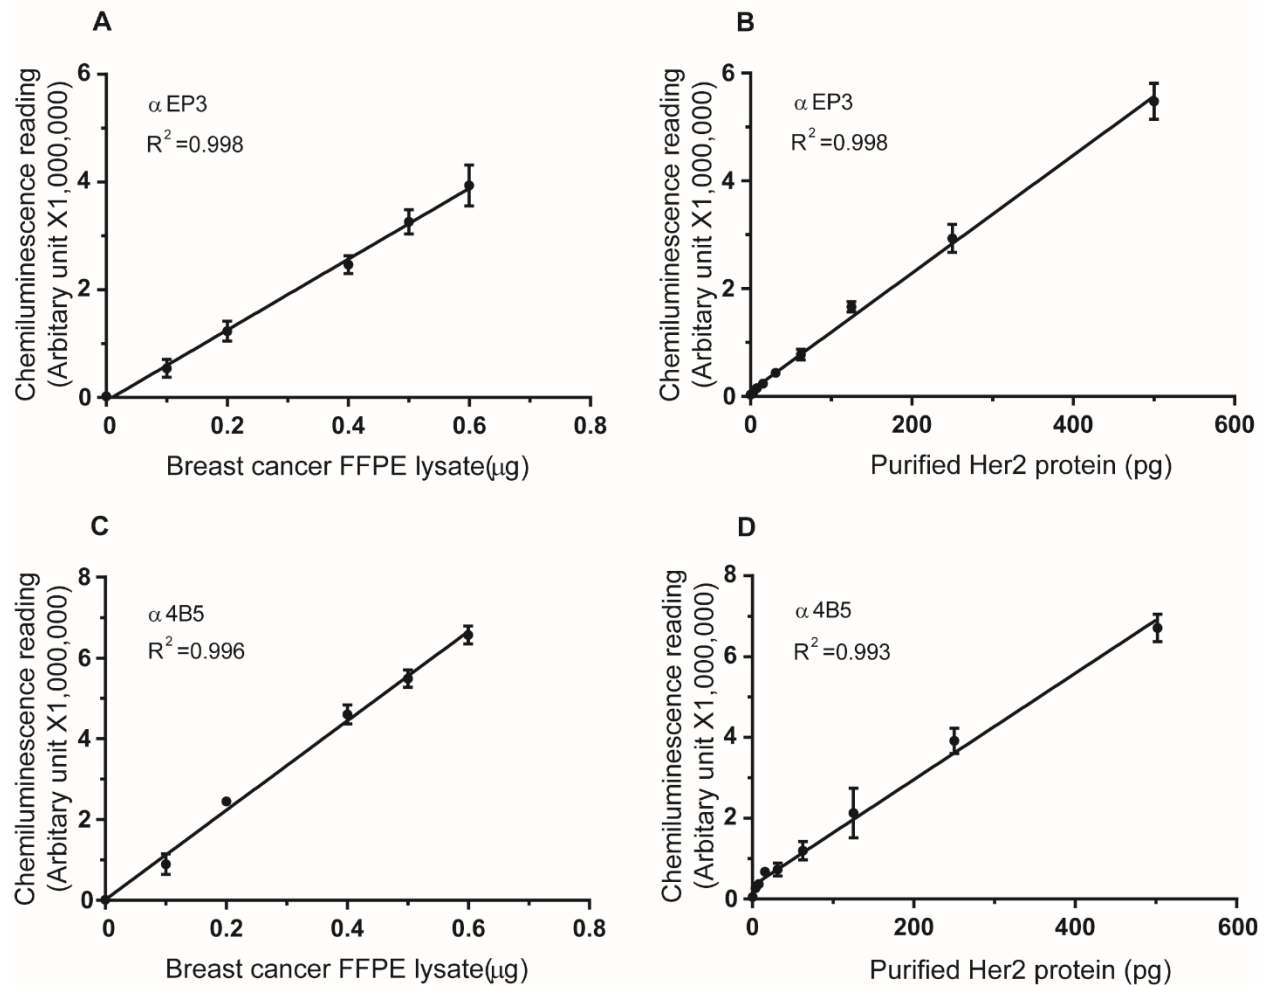

414  
415 (A, C) Defining the linear range of QDB method for analysis of breast cancer FFPE  
416 tissue lysates. Human breast cancer FFPE tissue blocks in two 15  $\mu$ m slices (2X15  $\mu$ m)  
417 were obtained from a local hospital, and the sample lysates were prepared as described  
418 in Materials and Methods. Breast cancer FFPE tissue lysates prepared from 4 samples

419 with an IHC score of 3+ were mixed in equal amounts based on the BCA assay. The  
 420 sample pools were serially diluted, as indicated in the figure, supplemented with 0.5  
 421  $\mu\text{g}/\mu\text{l}$  IgG-free BSA solution to ensure equal loading of the samples. The lysates were  
 422 then applied onto the QDB plate at 1  $\mu\text{g}/\text{unit}$  in triplicate for QDB analysis using two  
 423 anti-Her2 antibodies, EP3 and 4B5 respectively. (B, D) Defining the linear range of  
 424 QDB method for analysis of purified Her2 recombinant protein. The Her2 recombinant  
 425 protein was serially diluted supplemented with 0.5  $\mu\text{g}/\mu\text{l}$  IgG-free BSA solution. The  
 426 diluted solution was then used for QDB analysis at 1  $\mu\text{g}/\text{unit}$  in triplicate for  
 427 measurement with EP3 and 4B5 antibodies respectively.

428 **Fig. 2: The flow diagram of participants.**

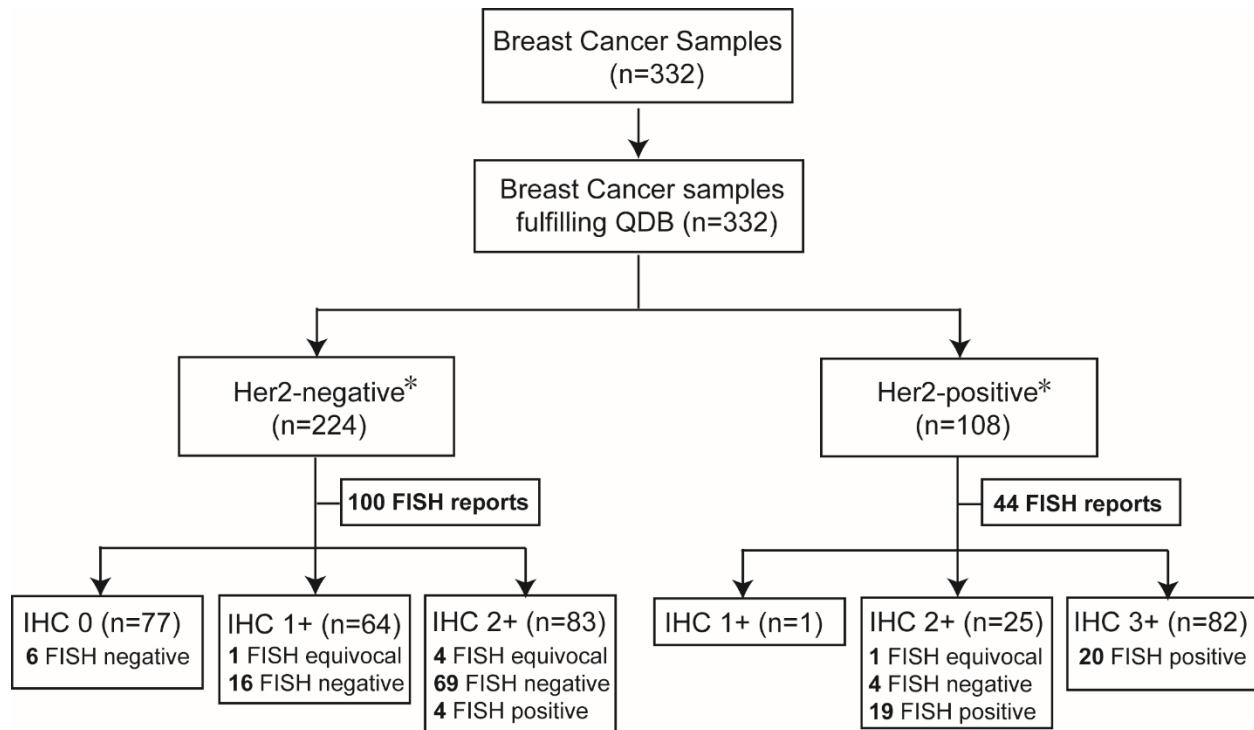

429 \* based on cutoff value at 0.267 nmole/g derived from ROC analysis with results from IHC analysis when analyzed with EP3 antibody

430 **Fig. 3: Correlation of Her2 levels measured with 4B5 and EP3 respectively.**

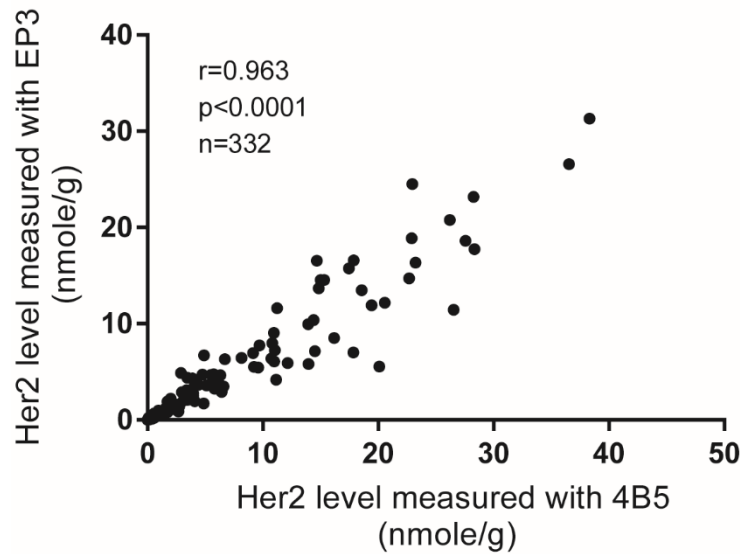

431

432 A total of 332 breast cancer FFPE tissues in 2x15  $\mu\text{m}$  slices were provided by a local  
433 hospital. MCF-7 and BT474 cell lysates were used as internal controls. FFPE tissue  
434 lysates (about 0.5  $\mu\text{g}$ /unit) and cell lysates (about 0.3  $\mu\text{g}$ /unit) were applied onto the  
435 QDB plates at 2  $\mu\text{l}$ /unit in triplicate for the QDB measurements with clone EP3 and 4B5  
436 respectively. A set of serially diluted Her2 recombinant protein were included in each  
437 plate to develop plate-specific standard curve. All results were averaged from three  
438 independent experiments, with each sample in triplicate. The correlation of Her2 levels  
439 measured with 4B5 and EP3 was analyzed with Pearson's correlation coefficient  
440 analysis using Graphpad software,  $r=0.963$ ,  $p<0.0001$ .

441 **Fig. 4: Distribution of all 332 samples.**

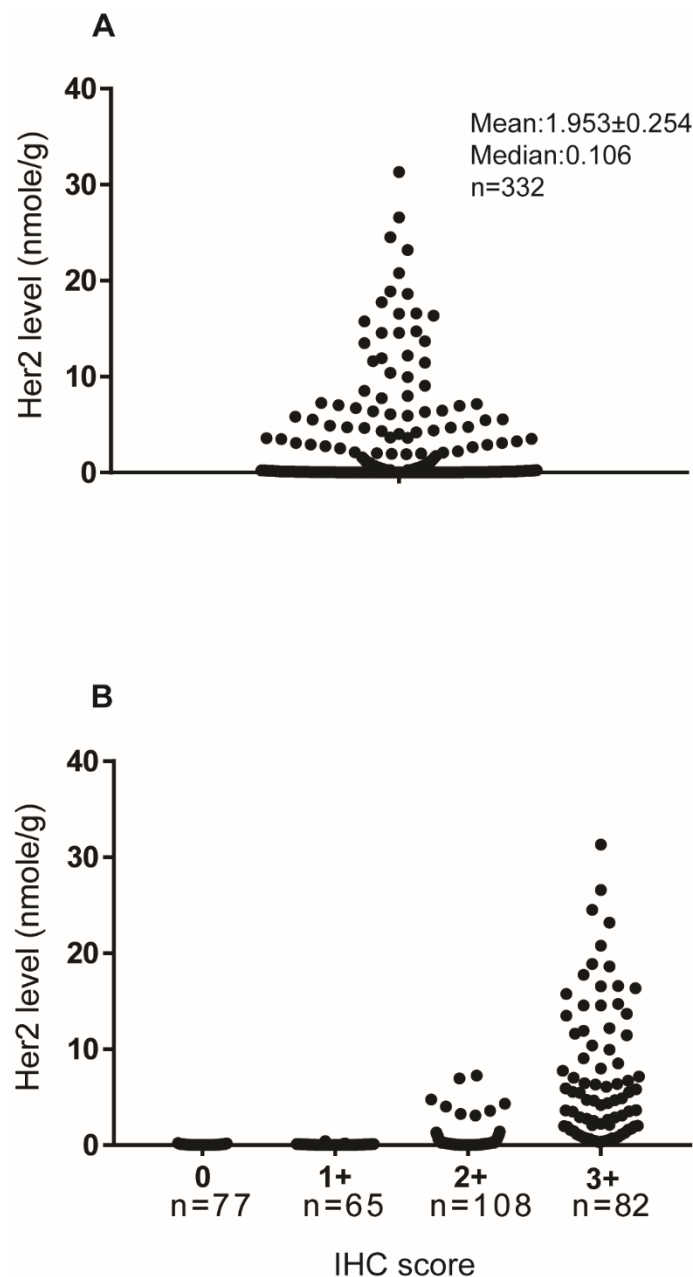

442

443 Her2 levels in all 332 breast cancer FFPE sample lysates were measured with QDB

444 method using EP3 antibody. The lysates were diluted to about 0.25  $\mu\text{g}/\mu\text{l}$ , and then 2  $\mu\text{l}$

445 lysate was used for each sample. (A) the distribution of Her2 levels among 332

446 samples. Her2 levels were ranging from 0 (chemiluminescence readings less than two

447 times the background) to 31.31 nmole/g, with the mean at 1.953±0.254 nmole/g. The

448 25th percentile was at 0 nmole/g and the 75th percentile was at 0.987 nmole/g. (B) All  
449 samples were grouped by their IHC scores provided by local hospital. The distributions  
450 of Her2 levels in each IHC group were recorded as following: **0**, 0~0.205 nmole/g,  
451 mean=0.045±0.006 nmole/g, n=77; **1+**, 0~0.41 nmole/g, mean=0.049±0.008 nmole/g,  
452 n=65; **2+**, 0~7.25 nmole/g, mean=0.537±0.122 nmole/g, n=108; and **3+**, 0.329~31.31  
453 nmole/g, mean= 7.12±0.773 nmole/g, n=82. The intra- and inter-CV were 8.98% and  
454 9.89% respectively.

455 **Fig. 5: Evaluation of QDB method with IHC and FISH analyses using Receiver**  
456 **Operating Characteristic (ROC) analysis.**

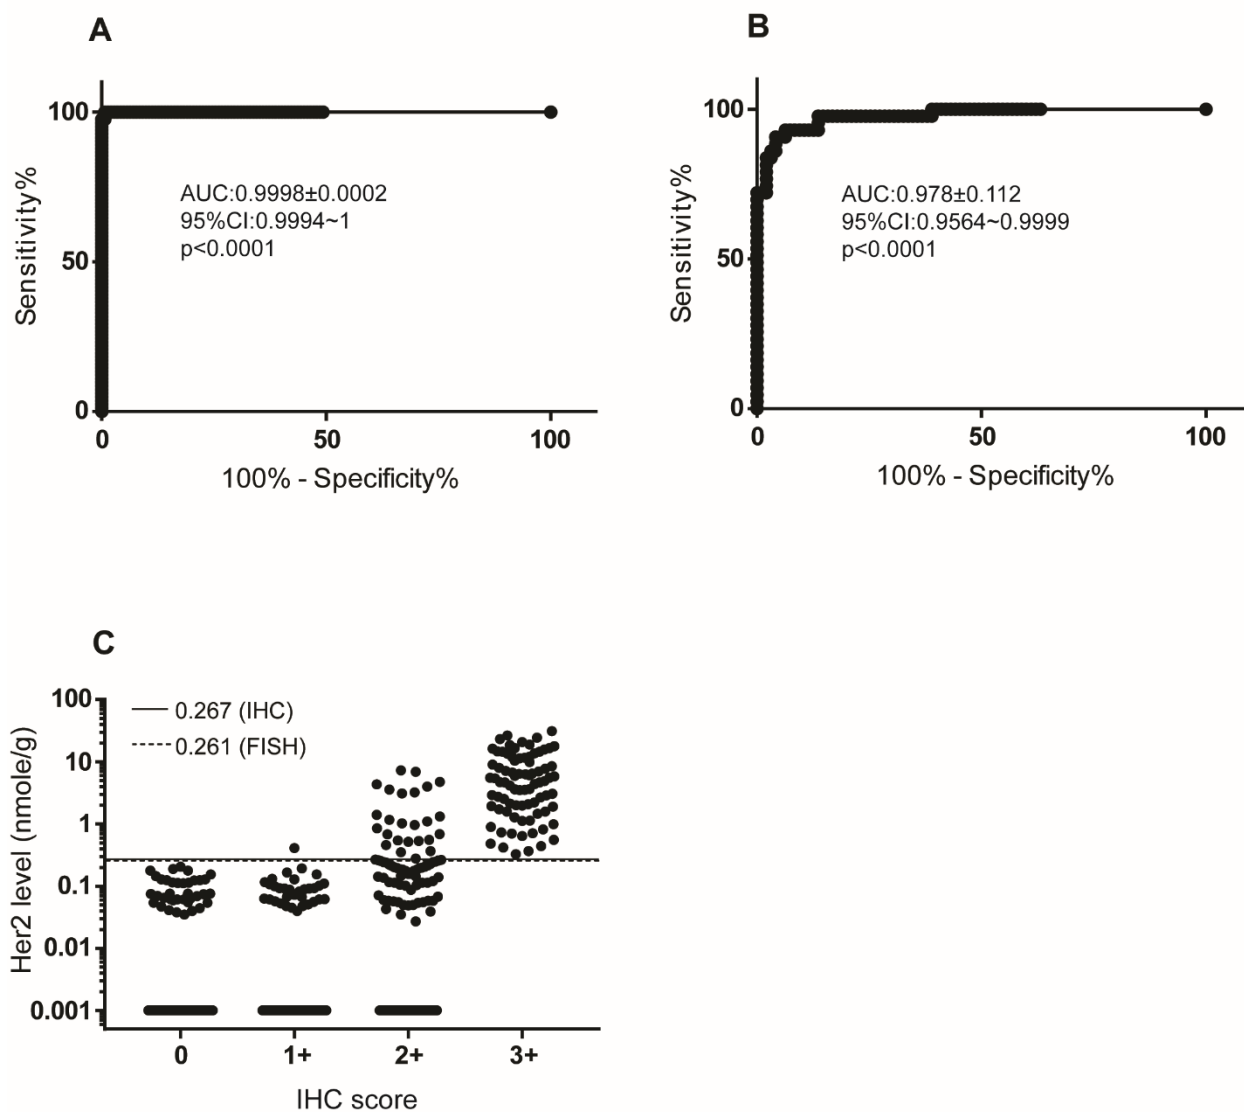

457

458 Samples were separated into negative (her2-) and positive (Her2+) groups based on the

459 recommendations from ASCO/CAP. In (A), samples were grouped based on their IHC

460 scores, with 142 samples in the negative group (IHC 0 and 1+), and 82 samples in the

461 positive group (IHC 3+). Absolute Her2 levels from these samples were used for ROC

462 analysis with Graphpad Prism7.0 software. The ROC curve of QDB analysis was

463 obtained with area under the Curve (AUC) at 0.9998 ± 0.0002; 95% CI: 0.9994 ~ 1;



464  $P < 0.0001$ . In (B), samples were grouped based on FISH results, with 95 samples as  
465 negative (her2-) group and 43 samples as positive (Her2+) group. 6 equivocal cases  
466 were excluded in the analysis. Absolute Her2 levels from these samples were used for  
467 ROC analysis with Graphpad Prism7.0 software. The area under the curve (AUC) was  
468 at  $0.978 \pm 0.0112$ , with 95% CI at  $0.9561 \sim 0.9999$ ;  $P < 0.0001$ . (C) The samples were  
469 grouped by IHC scores, and the suggested cutoff values from ROC analyses in (A) at  
470  $0.267$  nmole/g (solid line), and in (B) at  $0.261$  nmole/g (dashed line) were shown to  
471 demonstrate the effectiveness of these cutoff values to separate samples from Her2+ to  
472 Her2- groups. Her2 levels were plotted in log scale to better demonstrate the  
473 distribution of QDB results among these samples. For those samples with undetectable  
474 Her2 level, a value of  $0.001$  nmole/g was arbitrarily entered to avoid omitting any  
475 sample in the log scale graph.

476 **Fig. 6: Assessment of correlation between Her2 gene copy numbers (Her2/CEP17)**  
477 **and their protein levels measured by QDB method.**

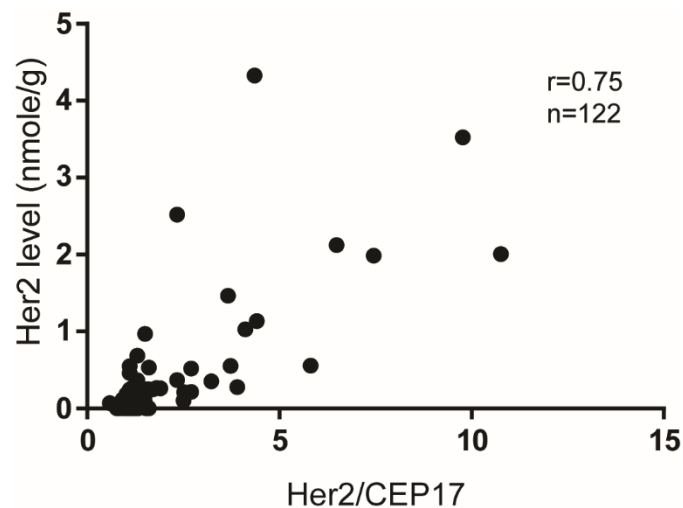

478

479 The correlation was assessed with Pearson correlation coefficient analysis using Her2  
480 protein levels from QDB analysis and Her2/CEP17 ratio from FISH analysis.  $r = 0.75$ ,  
481  $p < 0.0001$ . The statistical analysis was performed using Graphpad 7.0.

482 **Fig. 7: Assessing Her2 levels by histologic grade determined by Nottingham**  
483 **histologic scores.**

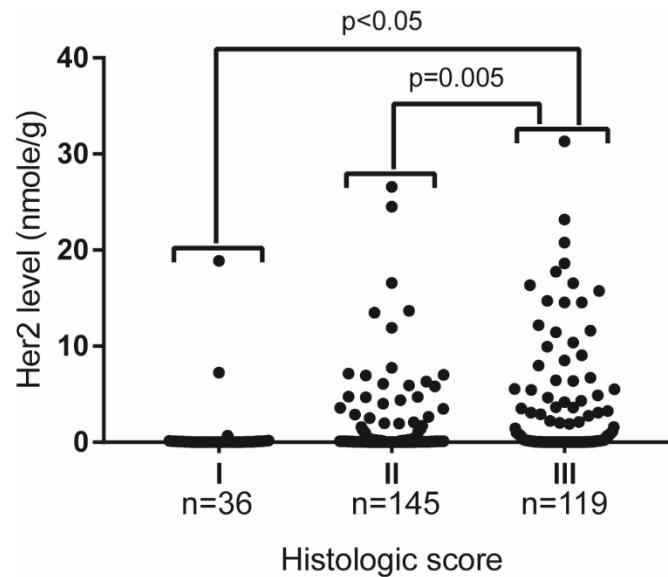

484  
485 The FFPE specimens (300 out of 332) were grouped according to their Nottingham  
486 histologic scores into grades I, II, and III. The Her2 levels of each grade were used for  
487 column statistics analysis with Graphpad Prism7.0 software. The mean $\pm$ SD of the Her2  
488 levels were 0.791 $\pm$ 0.555 nmole/g for grade I (n=36), 1.554 $\pm$ 0.330 nmole/g for grade II  
489 (n=145), and 3.271 $\pm$ 0.535 nmole/g for grade III (n=119). The statistical difference was  
490 assessed with an unpaired two-tailed Student's t-test, with  $p < 0.05$  between grades I and  
491 III, and  $p = 0.005$  between grades II and III. There was no statistical difference between  
492 grade I and grade II samples.
